# Supplementary material
Source: JCI journal article supplement (doi:10.1172/jci197308)
Supplement: sd1 [file 1]

**Supplemental Table 1- Demographic information.** Clinical profile of each participant.

|               | Sex    | Age | Year of Diagnosis | HIV Clade | HLA-A       | HLA-B       | HLA-C       |
|---------------|--------|-----|-------------------|-----------|-------------|-------------|-------------|
| Participant 1 | Female | 64  | 1992              | A1        | 01:01/11:01 | 35:01/57:41 | 04:01/06:02 |
| Participant 2 | Female | 58  | 2011              | K         | 02:01/30:02 | 15:31/57:03 | 16:01/18:02 |

**Supplemental Table 2- Total number of cells assayed.** Number of million cells assayed for each participant at each timepoint for each tissue type. The last two columns show the exact numbers of genome-intact and defective proviruses detected in each sample type. "Dx" denotes diagnosis.

| Participant   | Timepoint         | Sample Type | Total Cells Assayed (million) | # Intact Proviruses Detected | # Defective Proviruses Detected |
|---------------|-------------------|-------------|-------------------------------|------------------------------|---------------------------------|
| Participant 1 | 21 years after dx | PBMC        | 13                            | 13                           | 109                             |
|               |                   | LNMC        | 14                            | 2                            | 73                              |
|               | 31 years after dx | PBMC        | 16                            | 5                            | 22                              |
|               |                   | LNMC        | 18                            | 0                            | 13                              |
| Participant 2 | 4 years after dx  | PBMC        | 7                             | 68                           | 60                              |
|               |                   | LNMC        | 9                             | 10                           | 57                              |
|               | 13 years after dx | PBMC        | 18                            | 9                            | 123                             |
|               |                   | LNMC        | NA                            | NA                           | NA                              |

**Supplemental Table 3- Summary of Integration Sites.** For Participant 1 (A) and Participant 2 (B).

**A**

| Sequence No. | Viral Seq. Intactness | Chrom. | Position  | Strand | Gene                      | Intron/ Exon | Repeats              |
|--------------|-----------------------|--------|-----------|--------|---------------------------|--------------|----------------------|
| 1            | Intact                | chr12  | 41915474  | -      | pericentromeric satellite | n/a          | LINE: L1MC4          |
| 2            | Intact                | chr19  | 28343284  | +      | centromere                | n/a          | Satellite: ALR/Alpha |
| 3            | Intact                | chr19  | 43147022  | +      | <i>C19orf47</i>           | Intron       |                      |
| 4            | Intact                | chr2   | 98103038  | -      | pericentromeric satellite | n/a          |                      |
| 5            | Intact                | chr21  | 31110139  | +      | <i>PAXBP1</i>             | Intron       |                      |
| 6            | Intact                | chr21  | 9287355   | +      | pericentromeric satellite | n/a          |                      |
| 7            | Intact                | chr22  | 6878839   | +      | pericentromeric satellite | n/a          | Satellite: HSATIB    |
| 8            | Premature Stop Codon  | chr19  | 46950922  | +      | <i>ZNF225</i>             | Intron       |                      |
| 9            | 5' defect             | chr16  | 72851644  | -      | <i>CBFB</i>               | Intron       | LINE: L1ME3F         |
| 10           | 5' defect             | chr19  | 16772100  | +      | <i>SMIM7</i>              | Intron       | SINE: AluJb          |
| 11           | Large Deletion        | chr1   | 168666477 | -      | <i>NME7</i>               | Intron       |                      |
| 12           | Large Deletion        | chr11  | 65499905  | -      | <i>TALAM1</i>             | Exon         |                      |
| 13           | Large Deletion        | chr18  | 21732603  | +      | <i>ESCO1</i>              | Intron       |                      |
| 14           | Large Deletion        | chr2   | 70221969  | -      | <i>TIA1</i>               | Exon         |                      |
| 15           | Large Deletion        | chr3   | 155197379 | -      | <i>MBNL1</i>              | Intron       |                      |
| 16           | Large Deletion        | chr6   | 170667800 | -      | non-genic                 | n/a          |                      |
| 17           | Large Deletion        | chrX   | 136592673 | -      | non-genic                 | n/a          | Retroposon: SVA_A    |

**B**

| Sequence No. | Viral Seq. Intactness | Chrom. | Position  | Strand | Gene                      | Intron/ Exon | Repeats              |
|--------------|-----------------------|--------|-----------|--------|---------------------------|--------------|----------------------|
| 1            | Intact                | chr10  | 42427651  | +      | pericentromeric satellite | n/a          | Satellite: HSATIII   |
| 2            | Intact                | chr14  | 63862303  | -      | <i>SUSD6</i>              | Intron       |                      |
| 3            | Intact                | chr15  | 36350378  | +      | <i>RASGRP1</i>            | Intron       |                      |
| 4            | Intact                | chr16  | 40763941  | +      | pericentromeric satellite | n/a          | Satellite: HSATII    |
| 5            | Intact                | chr22  | 15704628  | -      | centromere                | n/a          | Satellite: ALR/Alpha |
| 6            | Intact                | chr22  | 5917660   | +      | pericentromeric satellite | n/a          |                      |
| 7            | Intact                | chr7   | 93592514  | +      | <i>ANKIB1</i>             | Intron       |                      |
| 8            | Intact                | chr9   | 142159029 | -      | <i>FNBP1</i>              | Intron       |                      |
| 9            | Intact                | chr9   | 50920088  | +      | pericentromeric satellite | n/a          | Satellite: HSATII    |
| 10           | Intact                | chrX   | 46960227  | -      | non-genic                 | n/a          | LTR: MLT1B           |
| 11           | Large Deletion        | chr1   | 184305325 | +      | <i>NIBAN1</i>             | Intron       |                      |
| 12           | Large Deletion        | chr15  | 74657385  | +      | <i>SCAPER</i>             | Intron       | LINE: L1M4           |
| 13           | Large Deletion        | chr17  | 79650888  | +      | <i>CYTH1</i>              | Intron       | LINE: L1ME1          |
| 14           | Large Deletion        | chr19  | 44369480  | +      | <i>lncRNA</i>             | Intron       | LTR: ERV3-16A3_I     |
| 15           | Large Deletion        | chr4   | 36209628  | +      | <i>ARAP2</i>              | Intron       | SINE: MIR            |
| 16           | Large Deletion        | chr4   | 26927422  | +      | <i>STIM2</i>              | Intron       | LINE: L2a            |
| 17           | Large Deletion        | chr5   | 177965383 | -      | <i>GRK6</i>               | Intron       | LTR: MLT1I           |
| 18           | Large Deletion        | chr6   | 144762418 | -      | <i>PHACTR2</i>            | Intron       |                      |
| 19           | Large Deletion        | chr7   | 40176352  | -      | <i>CDK13</i>              | Intron       | LINE: L1PB3          |
| 20           | Large Deletion        | chr7   | 103734753 | -      | <i>PRKRIP1</i>            | Intron       | SINE: AluY           |
| 21           | Large Deletion        | chrX   | 12619852  | +      | <i>FAM9C</i>              | Exon         |                      |
| 22           | Large Deletion        | chrX   | 12875772  | +      | <i>LINC02154</i>          | Intron       | LINE: L1MA9          |
| 23           | Hypermut              | chr4   | 39860467  | +      | <i>PDS5A</i>              | Intron       |                      |

**Supplemental Table 4- Summary of CTL escape mutations across different HLA alleles.** For Participant 1 (**A**) and Participant 2 (**B**), the table shows the numbers of cytotoxic T lymphocyte (CTL) escape mutations, and the corresponding wild-type (WT) epitope sequences with observed variant forms. Escape mutations are indicated by amino acid substitutions, insertions, or deletions compared to WT sequences.

**A**

| HLA      | Number of CTL escape epitopes analyzed | Epitopes containing an escape mutation | WT Epitope  | Variant     |
|----------|----------------------------------------|----------------------------------------|-------------|-------------|
| HLA-A*01 | 1                                      | 0                                      |             |             |
| HLA-A*11 | 11                                     | 5                                      | ACQGVGGPGHK | -----S--    |
|          |                                        |                                        | SVITQACPK   | --K-----    |
|          |                                        |                                        | AVDLSHFLK   | -F--GF---   |
|          |                                        |                                        | IIATDIQTK   | M----L---   |
|          |                                        |                                        | QVPLRPMTYK  | --V-----    |
| HLA-B*35 | 12                                     | 5                                      | VPVWKEATTTL | ----RD-D--- |
|          |                                        |                                        | NSSKVSQNY   | NNSQ-----   |
|          |                                        |                                        | HPVHAGPIA   | --PQ----P   |
|          |                                        |                                        | HPDIVIYQY   | N-E-----    |
|          |                                        |                                        | IPLTEEAEL   | V---A----   |
| HLA-B*57 | 12                                     | 3                                      | TSTLQEQIGW  | -----R-     |
|          |                                        |                                        | AISPRTLNAW  | PV-----     |
|          |                                        |                                        | KAAFDLSFF   | -G---G--    |
| HLA-C*04 | 1                                      | 0                                      |             |             |

**B**

| HLA      | Number of CTL escape epitopes analyzed | Epitopes containing an escape mutation | WT Epitope  | Variant    |
|----------|----------------------------------------|----------------------------------------|-------------|------------|
| HLA-A*02 | 17                                     | 4                                      | RGPGRAFVTI  | F---Q--YAT |
|          |                                        |                                        | PLTFGWCYKL  | -----F--   |
|          |                                        |                                        | VLEWRFD SRL | --K-V----- |
|          |                                        |                                        | ALVEICTEM   | --T-----   |
| HLA-A*30 | 10                                     | 1                                      | KQNPDIYIY   | IK--E----  |
| HLA-B*15 | 18                                     | 3                                      | SFNCGGEFF   | ----R----  |
|          |                                        |                                        | WRFDSRLAF   | -V-----L   |
|          |                                        |                                        | FQTKGLGISY  | -LH-G----- |
| HLA-B*57 | 12                                     | 2                                      | QASQEVKNW   | -CT----G-  |
|          |                                        |                                        | KAAFDSLFF   | -G-V---H-  |
| HLA-C*18 | 4                                      | 0                                      |             |            |
